# Supplementary material
Source: publisher figshare collection journal article supplement (https://acs.figshare.com/ndownloader/files/28915438)
Supplement: Supplementary file 1 [file 28915438]

# Supporting Information

## Transforming C<sub>60</sub> Molecules into Polyhedral Carbon Micro-Nano-Shells for Electrochemically Producing H<sub>2</sub>O<sub>2</sub> in Neutral Electrolyte

*Rongtao Hu,<sup>a,b</sup> Yaqi Cui,<sup>a</sup> Bing Huang,<sup>a,b</sup> and Lunhui Guan<sup>\*a</sup>*

a. CAS Key Laboratory of Design and Assembly of Functional Nanostructures, and  
Fujian Key Laboratory of Nanomaterials, Fujian Institute of Research on the Structure  
of Matter, Chinese Academy of Sciences, Fuzhou, Fujian 350002, China

b. University of Chinese Academy of Sciences, Beijing 100049, China

### **Corresponding Author**

\*Lunhui Guan

E-mail: guanlh@fjirsm.ac.cn

## Experimental methods

**1. Selection of calcination temperature:** Considering the thermogravimetric analysis and the reference [*Angew. Chem. Int. Ed.* **2019**, 58, 3859–3864], we decided the calcination temperature. As shown in **Figure S1**, the thermogravimetric curve displays two prominent mass decrease processes. The first mass decrease process starts at around 200 °C and ends at around 700 °C. And the second mass decrease process happens during 700~900 °C. This means 700 °C is a critical temperature. Therefore, the sample was heated at 700 °C and 900 °C, respectively.

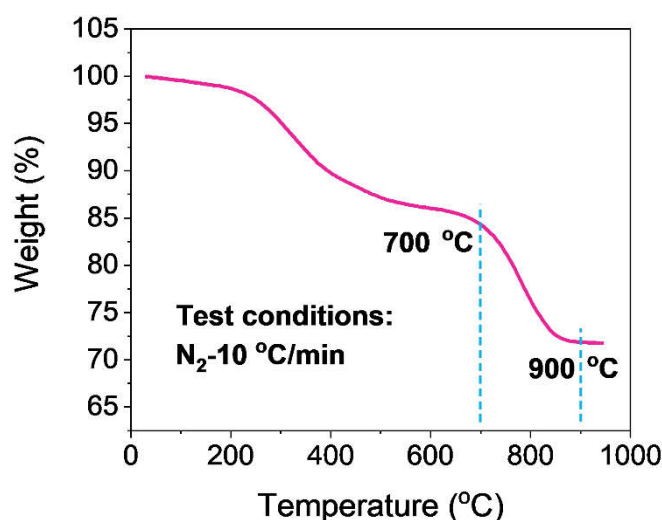

**Figure S1.** Thermogravimetric curve of “With thiophene”. (“With thiophene” is the brown sample obtained after vacuum-filtration and before solid calcination)

## 2. Calibration of the saturated AgCl/Ag reference electrode:

The calibration of the saturated AgCl/Ag reference electrode was carried out in H<sub>2</sub>-saturated 0.1 M KOH solution. The testing system consists of two polished Pt wires (as working electrode and counter electrode, respectively) and the saturated AgCl/Ag reference electrode (as reference electrode). Linear sweep voltametric curve was recorded with scan rate of 1 mV/s. The potential at which the current crosses zero is taken to be the thermodynamic potential (vs. AgCl/Ag) for the hydrogen oxidation reaction (HOR) and hydrogen evolution reaction (HER). As shown in **Figure S2**, the potential is -0.960 V when the current is zero. Therefore,  $E(\text{vs. RHE}) = E(\text{vs. AgCl/Ag}) + 0.960 \text{ V}$ . (The standard conversion relation is  $E(\text{vs. RHE}) = E(\text{vs. AgCl/Ag}) + 0.964 \text{ V}$ ,  $0.964 = 0.197 + 0.059 \times 13$ )

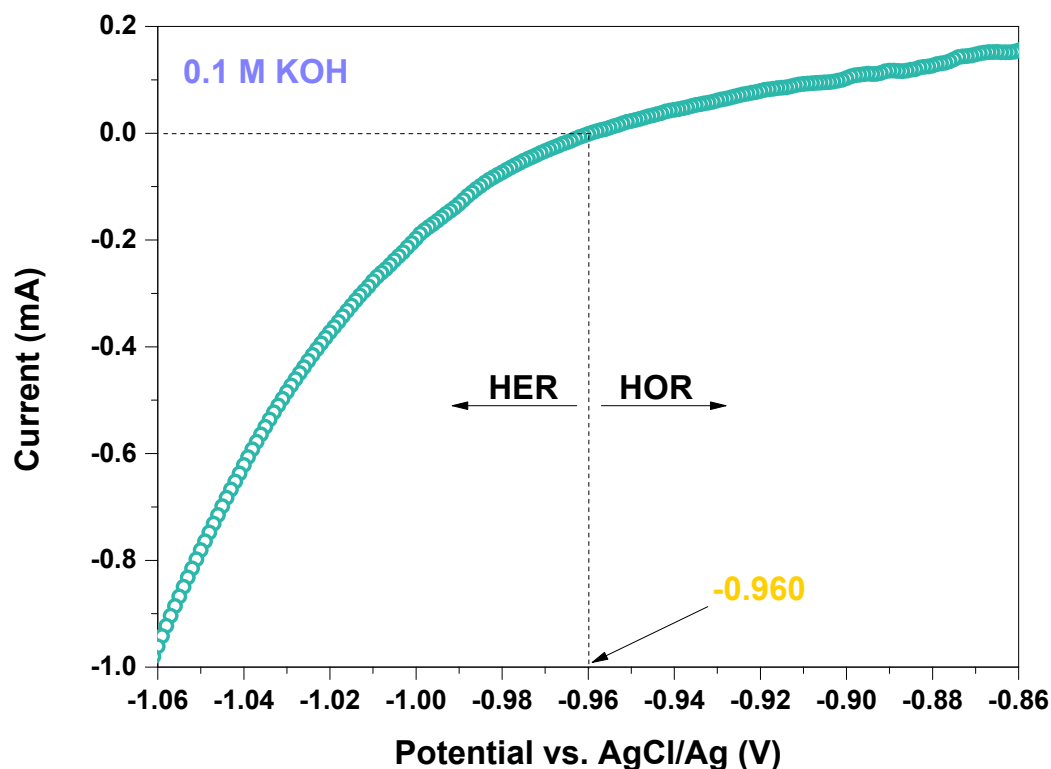

**Figure S2.** Calibration curve of the saturated AgCl/Ag reference electrode.

### 3. Calibration of collection efficiency ( $N_c$ ) of the Rotating Ring Disk Electrode:

**Step 1.** Cyclic voltammetry curve was recorded in  $N_2$ -saturated 0.1 M KOH- 0.004 M  $K_3Fe(CN)_6/K_4Fe(CN)_6$  solution with scan rate of 10 mV/s.

**Step 2.** Amperometric  $i$ - $t$  curve was recorded 60 s at 1600 rpm in  $N_2$ -saturated 0.1 M KOH- 0.004 M  $K_3Fe(CN)_6$  solution when the disk electrode was controlled at a constant potential of 0 V (vs. AgCl/Ag, the same later) and the ring electrode was maintained at a constant potential of 0.5 V. As shown in **Figure S3**, the ring current is averaged as 0.260 mA at the last 10 s and the mean disk current of the last 10 s is 0.700 mA. As a result, the collection efficiency of Rotating Ring Disk Electrode is calculated as 0.37.

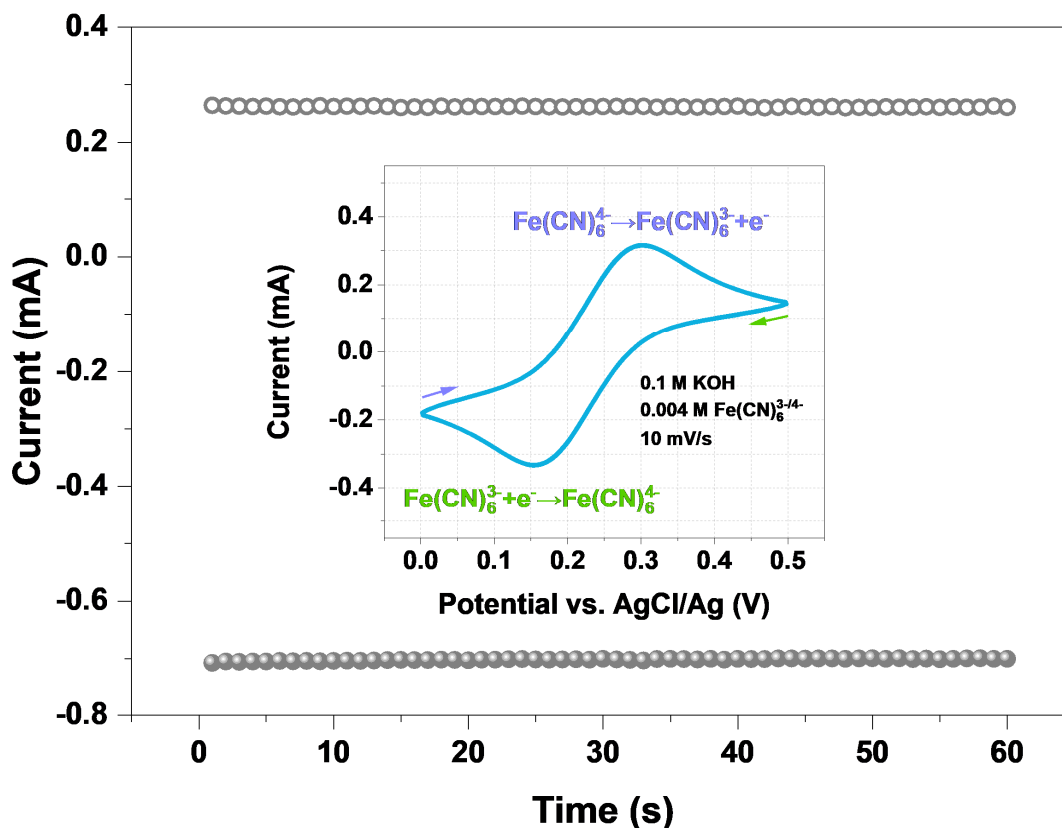

**Figure S3.** Calibration of collection efficiency ( $N_c$ ) of the Rotating Ring Disk Electrode.

**4. H-type electrolytic cell test.** 20  $\mu\text{L}$  ink was fully coated onto the Carbon paper of 1  $\text{cm}^2$  as the composite electrode (PCMNS/Carbon paper). Two electrolytic tanks separated by activated proton exchange membrane (PEM) were respectively filled with 25.0 mL 0.1 M  $\text{K}_2\text{SO}_4$ . After electrolysis for one specific time interval, 1.0 mL electrolyte was extracted out of the electrolytic tank with working electrode and mixed with 1.0 mL coloring solution (5.0 mM  $\text{Ce}^{4+}$ ). Then, 1.0 mL 0.1 M  $\text{K}_2\text{SO}_4$  was injected back into that electrolytic tank and the next electrolysis was continued. These steps were repeated until the mixture solution did not appear yellow. These mixture solutions obtained at different electrolytic time were diluted by 10.0 mL 0.1 M  $\text{K}_2\text{SO}_4$  and transfer 3.0 mL liquid in cuvette for latter Ultraviolet-visible-near infrared absorption spectroscopy.

## Results and discussion

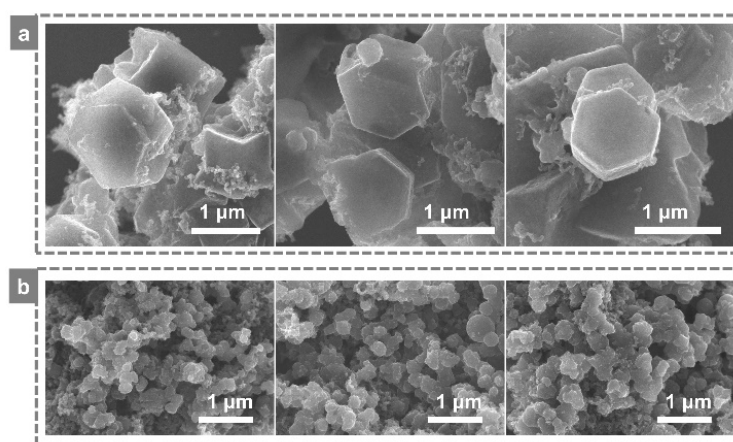

**Figure S4.** SEM comparison between the polyhedral carbon micro-nano shells (a) and the amorphous carbon nano-aggregates (b).

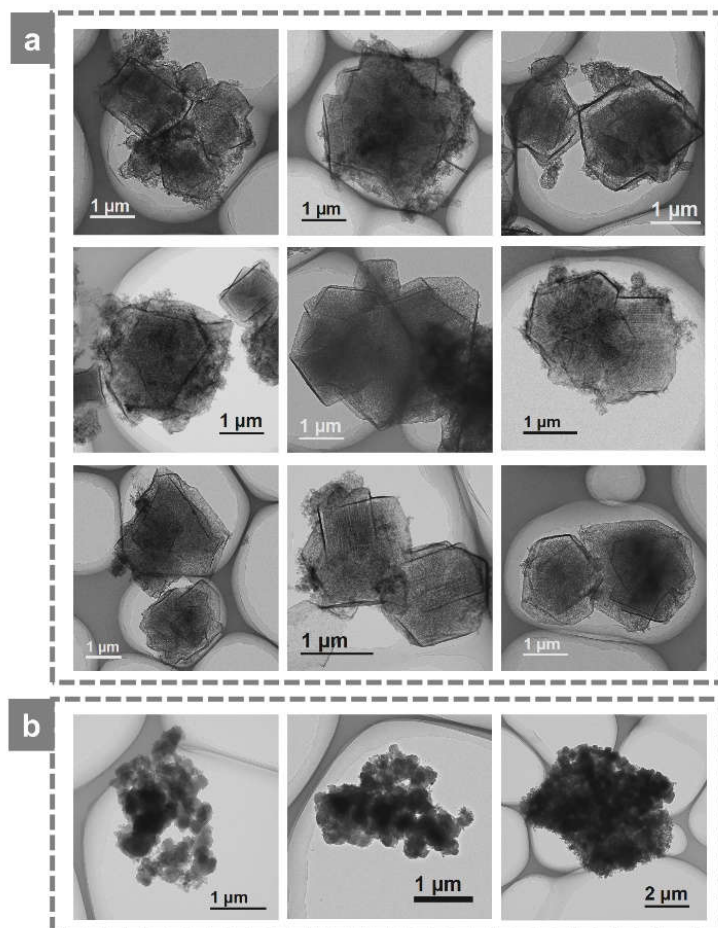

**Figure S5.** TEM comparison between the polyhedral carbon micro-nano shells (a) and the amorphous carbon nano-aggregates (b).

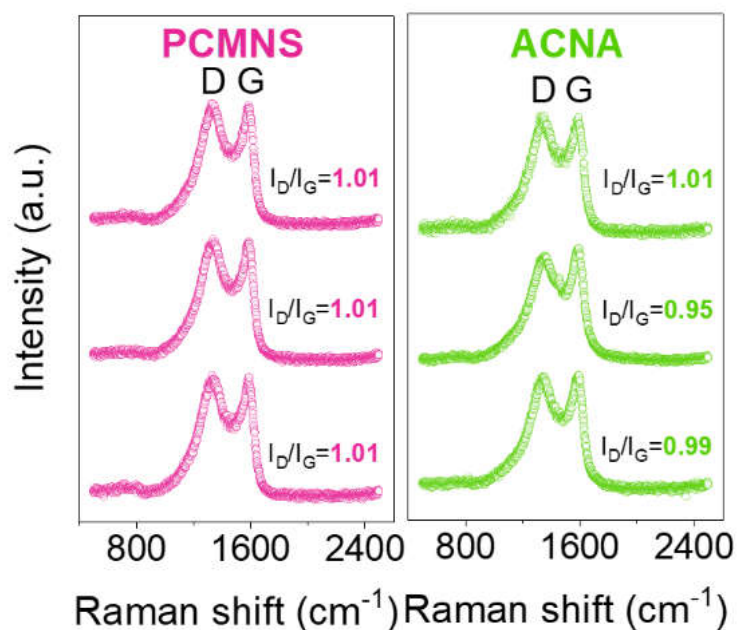

**Figure S6.** Raman spectra comparison between PCMNS and ACNA. Three Raman spectra were recorded randomly on three micro-domains within the identical sample. (PCMNS: Polyhedral Carbon Micro-Nano-Shells; ACNA: Amorphous Carbon Nano-Aggregates)

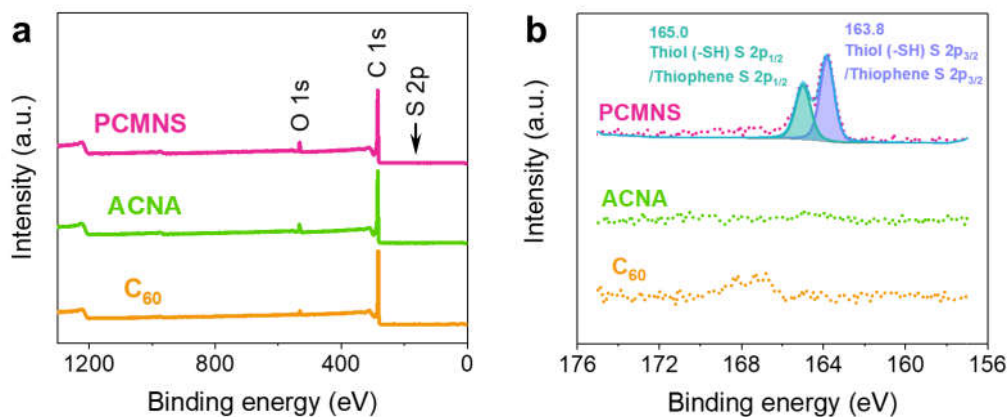

**Figure S7.** XPS comparison between PCMNS, ACNA and C<sub>60</sub>: survey spectra (a) and detailed S 2p spectra (b). (PCMNS: Polyhedral Carbon Micro-Nano-Shells; ACNA: Amorphous Carbon Nano-Aggregates)

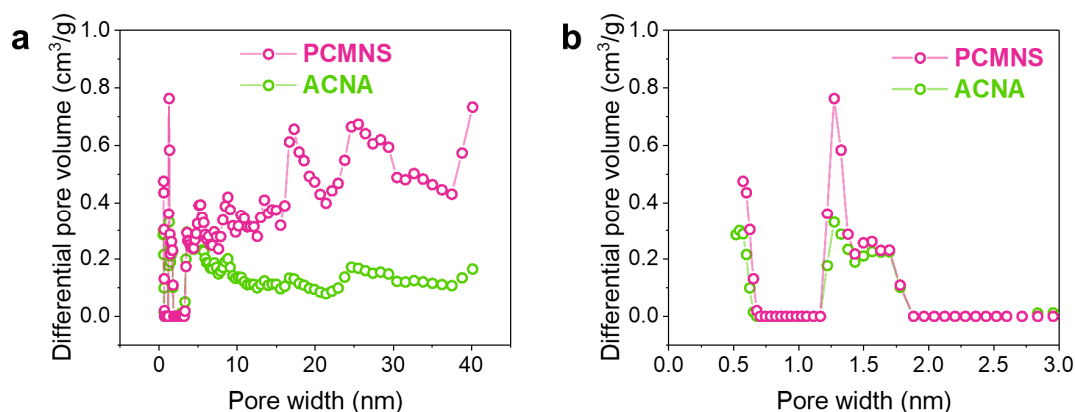

**Figure S8.** The pore volume-pore size distribution comparison between PCMNS and ACNA: pore width range of 0.5-40 nm (a) and 0.5-3.0 nm (b). (PCMNS: Polyhedral Carbon Micro-Nano-Shells; ACNA: Amorphous Carbon Nano-Aggregates)

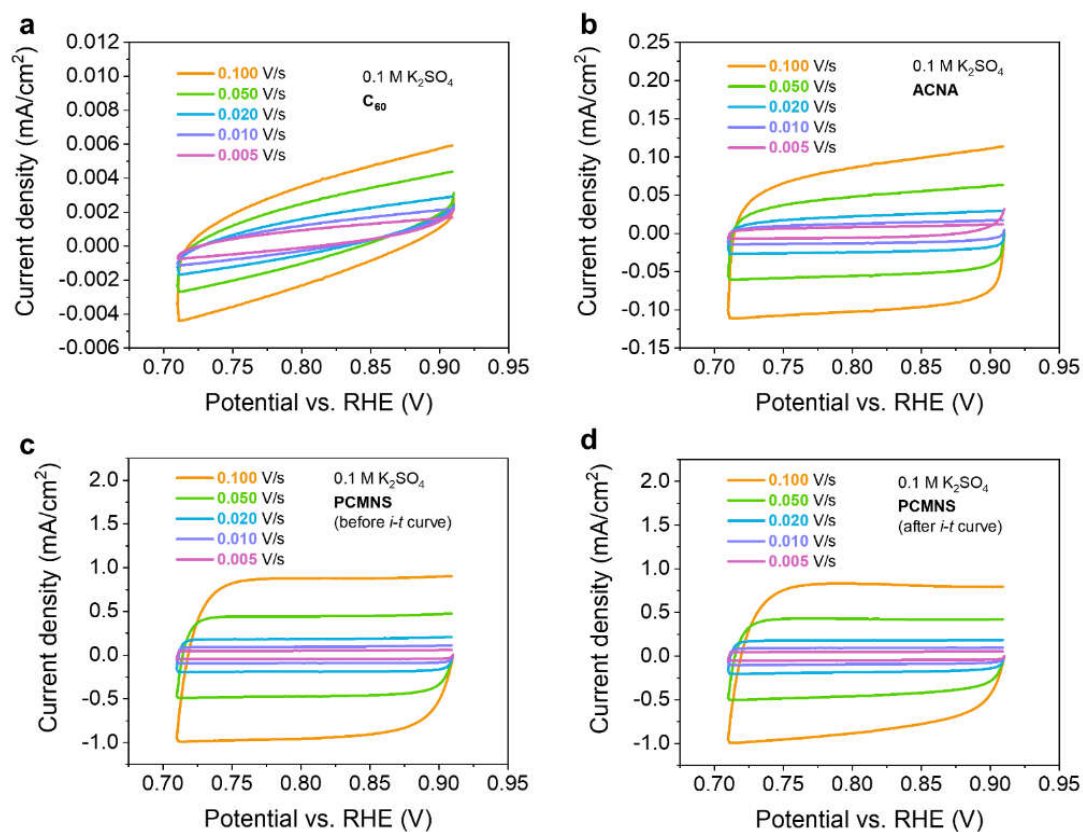

**Figure S9.** The electrochemical surface area (ECSA) of C<sub>60</sub> (a), ACNA (b) and PCMNS (c & d) estimated by cyclic voltammety curves on RRDE in 0.1 M K<sub>2</sub>SO<sub>4</sub>. (PCMNS: Polyhedral Carbon Micro-Nano-Shells; ACNA: Amorphous Carbon Nano-Aggregates)

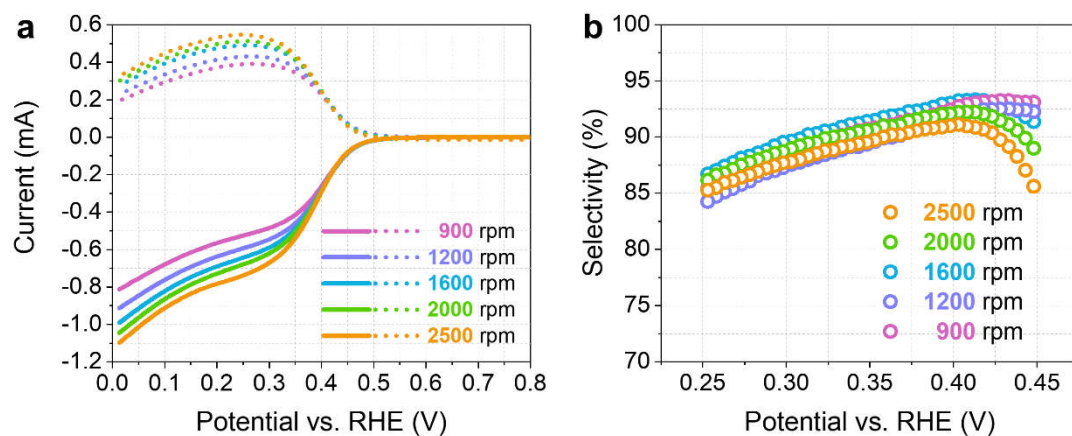

**Figure S10.** Linear sweep voltammetry curves (a) and selectivity-potential curves (b) of PCMNS recorded with different rotation speed. (PCMNS: Polyhedral Carbon Micro-Nano-Shells)

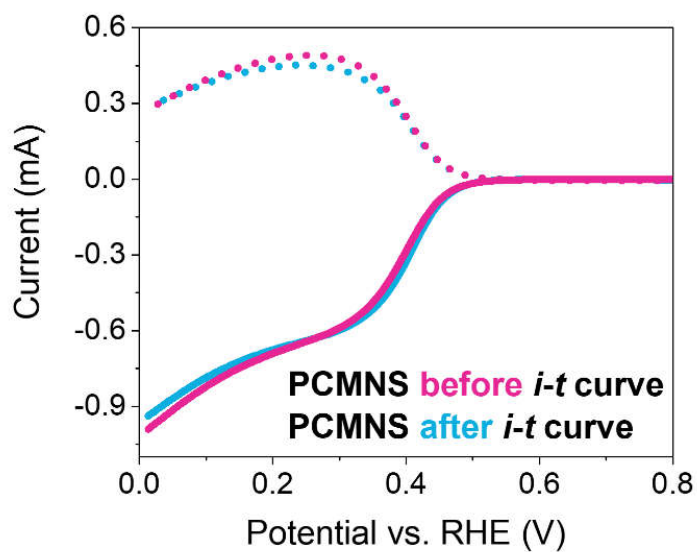

**Figure S11.** Linear sweep voltammetry curves of PCMNS recorded before and after stability test. (PCMNS: Polyhedral Carbon Micro-Nano-Shells)

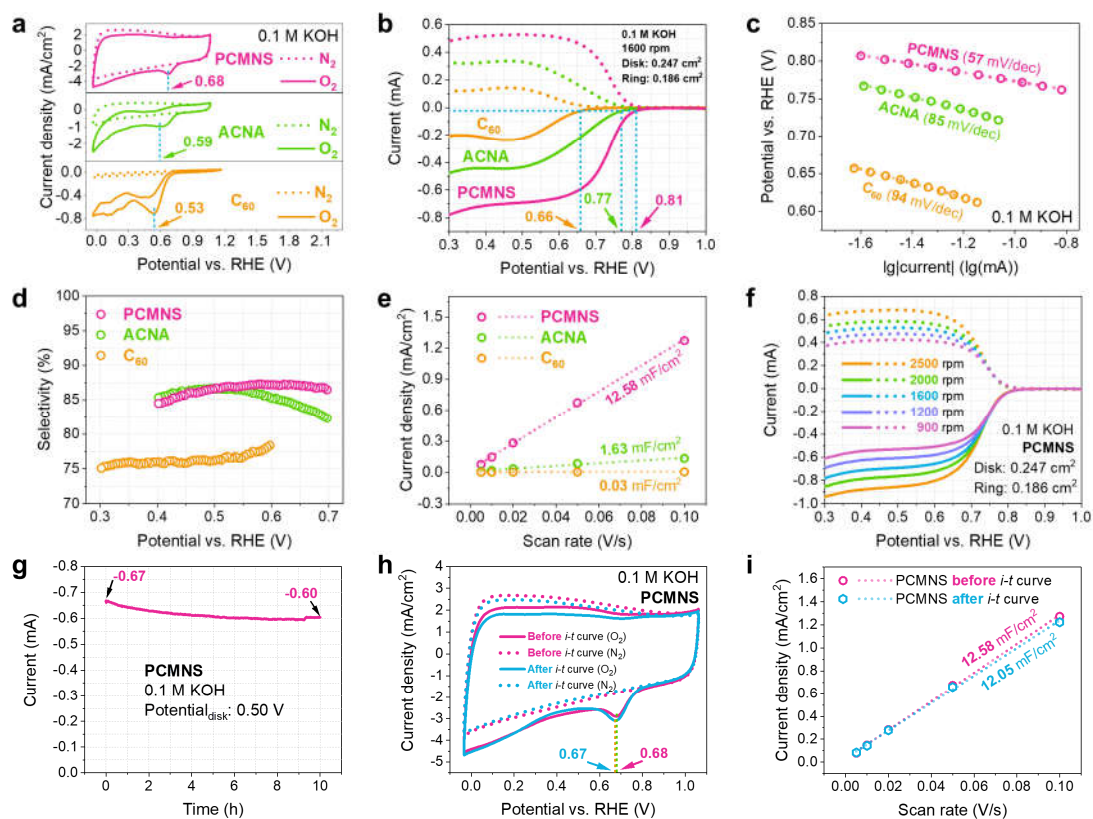

**Figure S12.** The electrocatalytic oxygen reduction reaction performance recorded on RRDE in 0.1 M KOH: cyclic voltammety curves (a), linear sweep voltammety curves (b), Tafel slopes (c), selectivity-potential curves (d) and electrochemical surface area (e) of PCMNS, ACNA and C<sub>60</sub>. Linear sweep voltammety curves of PCMNS recorded with different rotation speed (f). *i*-*t* curve of PCMNS (g), comparison of cyclic voltammety curves (h) and electrochemical surface areas (i) before and after potentiostatic test of PCMNS. (PCMNS: Polyhedral Carbon Micro-Nano-Shells; ACNA: Amorphous Carbon Nano-Aggregates)

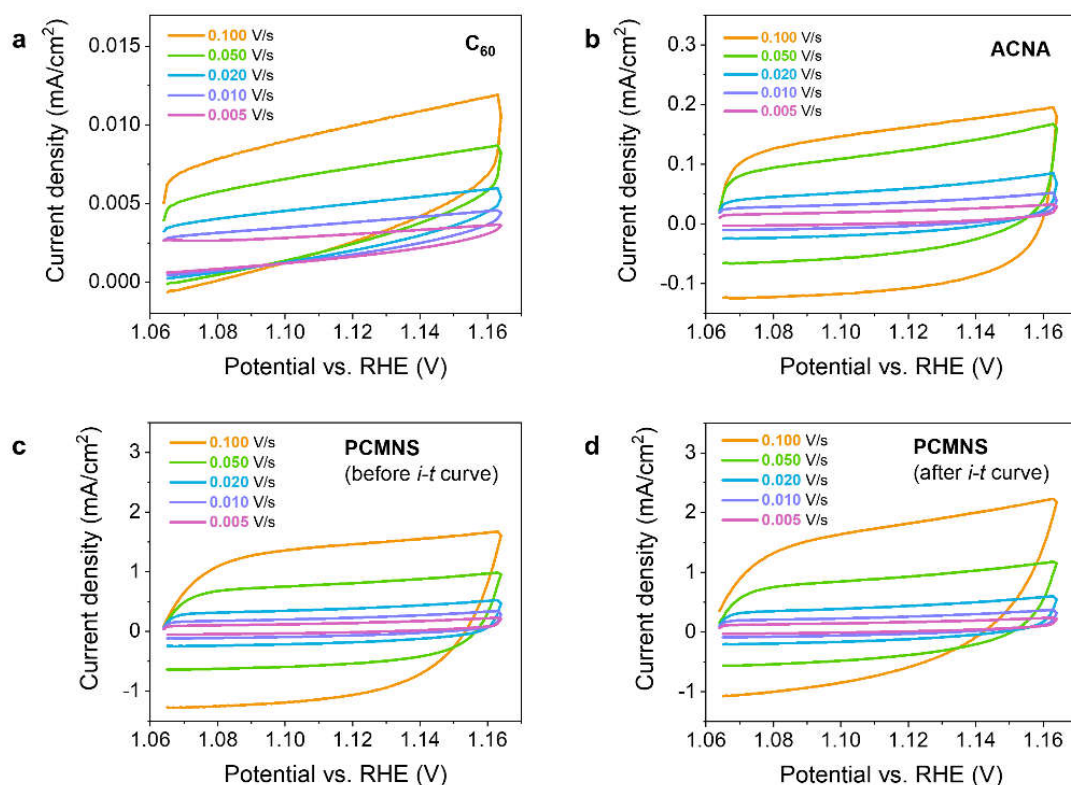

**Figure S13.** The electrochemical surface area (ECSA) of C<sub>60</sub> (a), ACNA (b) and PCMNS (c & d) estimated by cyclic voltammetry curves on RRDE in 0.1 M KOH. (PCMNS: Polyhedral Carbon Micro-Nano-Shells; ACNA: Amorphous Carbon Nano-Aggregates)

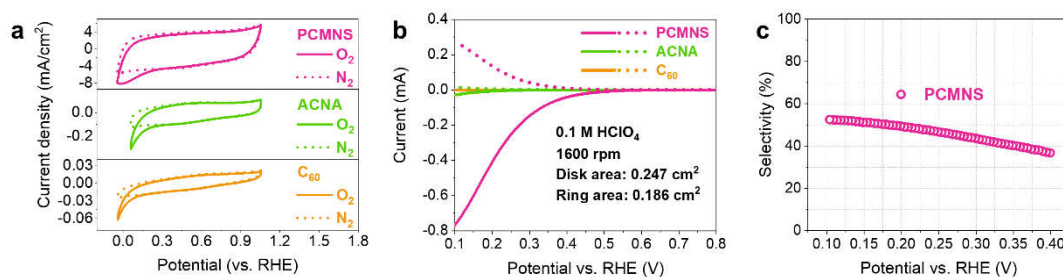

**Figure S14.** The electrocatalytic oxygen reduction reaction performance recorded on RRDE in 0.1 M HClO<sub>4</sub>: cyclic voltammetry curves (a), linear sweep voltammetry curves (b), selectivity-potential curves (c) of PCMNS, ACNA and C<sub>60</sub>. (PCMNS: Polyhedral Carbon Micro-Nano-Shells; ACNA: Amorphous Carbon Nano-Aggregates)

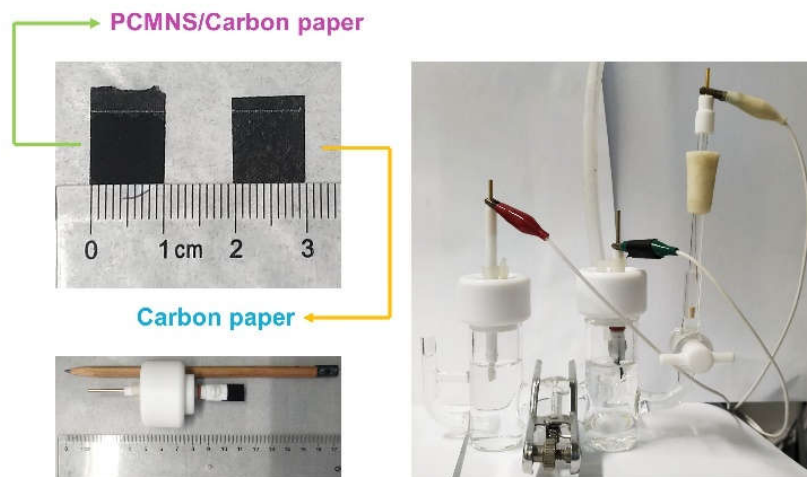

**Figure S15.** Practical photos of the PCMNS/Carbon paper electrode and the H-type electrolytic cell.

The direct relation between the absorbance value and the concentration of  $\text{H}_2\text{O}_2$  was based on the following equations (eqs):

$$A = kC_{\text{Ce}^{4+}} \quad (\text{S1})$$

$$= k(C_{\text{i,Ce}^{4+}} - 2C_{\text{H}_2\text{O}_2}) \quad (\text{S2})$$

$$= kC_{\text{i,Ce}^{4+}} - 2kC_{\text{H}_2\text{O}_2} \quad (\text{S3})$$

$A$  means the absorbance value in Ultraviolet-visible-infrared absorption spectrum,

$k$  means the proportional coefficient,

$C_{\text{Ce}^{4+}}$  means the concentration of residual  $\text{Ce}^{4+}$  in solution,

$C_{\text{i,Ce}^{4+}}$  means the initial concentration of the coloring solution,

$C_{\text{H}_2\text{O}_2}$  means the concentration of the synthesized  $\text{H}_2\text{O}_2$ .

Actually, the absorbance value is the proportional function of the concentration of residual  $\text{Ce}^{4+}$  in solution, as expressed in **eqs S1**. Based on the chemical reaction equation  $2\text{Ce}^{4+} + \text{H}_2\text{O}_2 \rightarrow 2\text{Ce}^{3+} + \text{O}_2 + 2\text{H}^+$ , the concentration of residual  $\text{Ce}^{4+}$  in solution is dependent on the concentration of the synthesized  $\text{H}_2\text{O}_2$ , as expressed in **eqs S2**. The consumed concentration of  $\text{Ce}^{4+}$  can be represented by the concentration of the synthesized  $\text{H}_2\text{O}_2$ , so it is natural to establish a direct relation between the absorbance

value and the concentration of the synthesized  $\text{H}_2\text{O}_2$ , as expressed in **eqs S3**.

The absorbance value- $\text{H}_2\text{O}_2$  concentration calibration curve was obtained by the following method:

1.0 mL coloring solution (5 mM  $\text{Ce}^{4+}$ ) was mixed respectively with four 1.0 mL  $\text{H}_2\text{O}_2$  solution of known concentration (labeled as TS1, TS2, TS3, TS4 in **Table**. The  $\text{H}_2\text{O}_2$  solution of known concentration), then every mixture (the photos of all the reacted mixture are shown in **Figure S16a**) was diluted with 10.0 mL 0.1 M  $\text{K}_2\text{SO}_4$  and shaken thoroughly. 3 of 12 mL liquid was transferred into cuvette for Ultraviolet-visible-near infrared absorption spectroscopy. The Ultraviolet-visible-near infrared absorption spectra are recorded as **Figure S16b**. Associating the highest absorbance value around 320 nm with the known  $\text{H}_2\text{O}_2$  concentration, we fit the absorbance value- $\text{H}_2\text{O}_2$  concentration calibration curve as **Figure S16c**. Via the intercept and slope of the fitted curve, we can know the practical concentration of the coloring solution is 4.5 mM, which is very close to the theoretical value 5.0 mM. This concentration error is a comprehensive result of activity coefficient, experimental operation and measurement deviation.

**Table.** The  $\text{H}_2\text{O}_2$  solution of known concentration

| Label | 9.77 M $\text{H}_2\text{O}_2$<br>( $\mu\text{L}$ ) | 0.1 M $\text{K}_2\text{SO}_4$<br>(mL) | Concentration of<br>$\text{H}_2\text{O}_2$ (mmol/L) |
|-------|----------------------------------------------------|---------------------------------------|-----------------------------------------------------|
| TS1   | 0                                                  | 40                                    | 0                                                   |
| TS2   | 3                                                  | 40                                    | 0.73                                                |
| TS3   | 6                                                  | 40                                    | 1.46                                                |
| TS4   | 9                                                  | 40                                    | 2.19                                                |

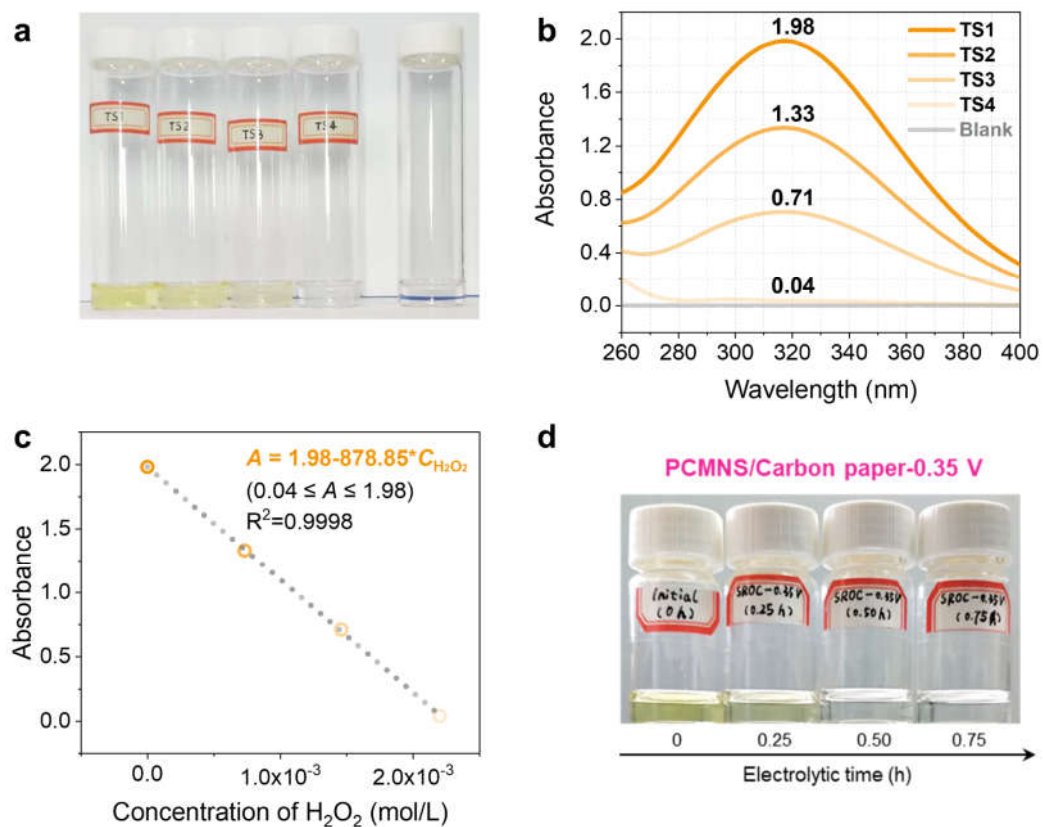

**Figure S16.** Practical photos (a) and Ultraviolet-visible-infrared absorption spectra (b) of the solution mixed by the same volume of coloring agent and different  $\text{H}_2\text{O}_2$  solution of known concentration. Absorbance value- $\text{H}_2\text{O}_2$  concentration calibration curve (c). Practical photos of the solution mixed by the same volume of coloring agent and electrolyte extracted at different electrolytic time (d).

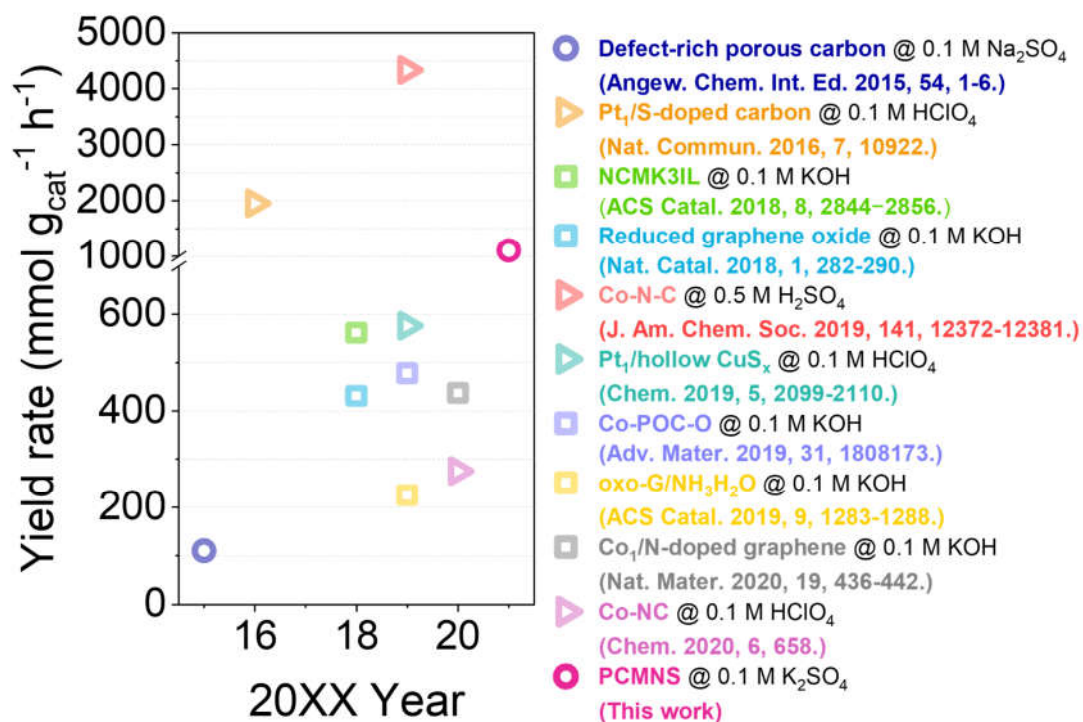

**Figure S17.** Yield rate comparison with the reported literatures.

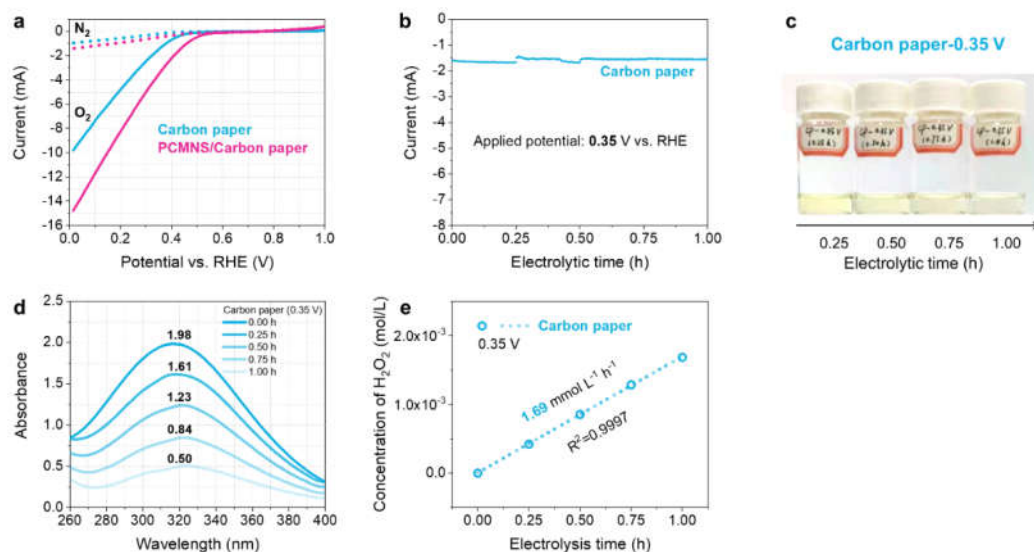

**Figure S18.** Linear sweep voltammetry curve (a) and *i-t* curve (b) of the Carbon paper electrode. Practical photos (c) and Ultraviolet-visible-near infrared absorption spectra (d) of the solution mixed by the same volume of coloring agent and electrolyte extracted at different electrolytic time. H<sub>2</sub>O<sub>2</sub> concentration-electrolytic time curve (e).

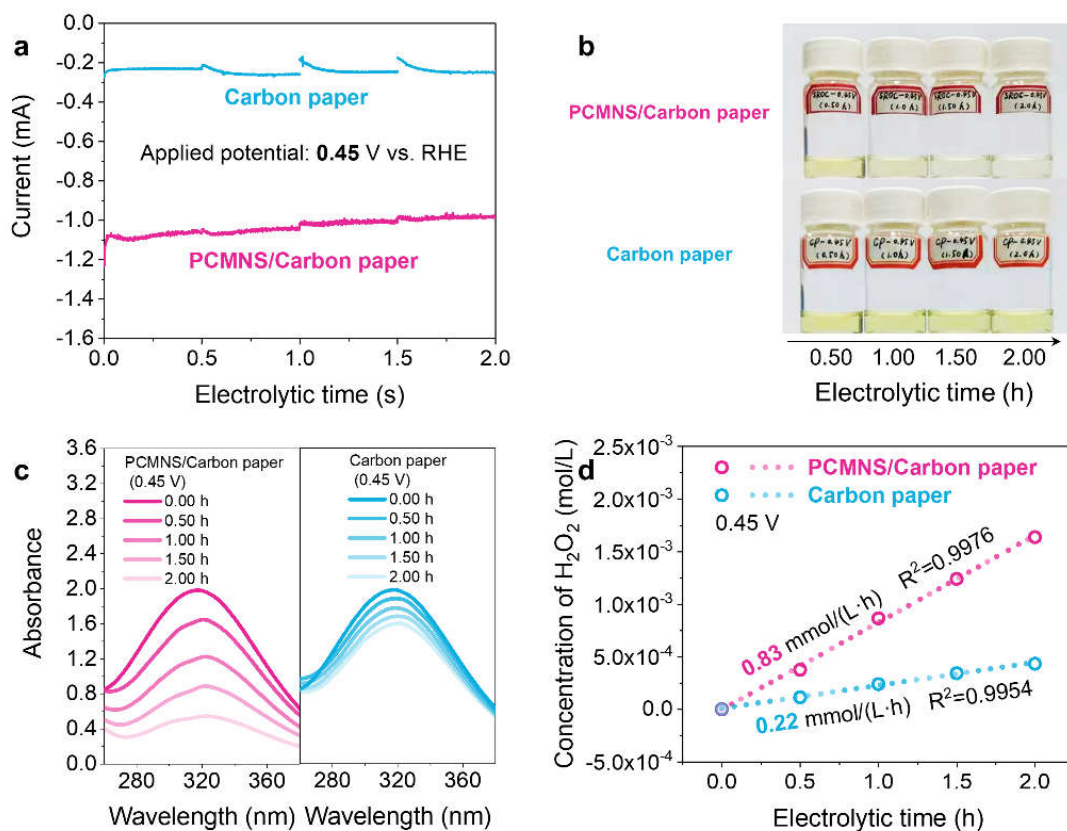

**Figure S19.** *I-t* curves with potential of 0.45 V (vs. RHE) of the Carbon paper electrode and PCMNS/Carbon paper electrode (a). Practical photos (b) and Ultraviolet-visible-near infrared absorption spectra (c) of the solution mixed by the same volume of coloring agent and electrolyte extracted at different electrolytic time.  $H_2O_2$  concentration-electrolytic time curves (d).

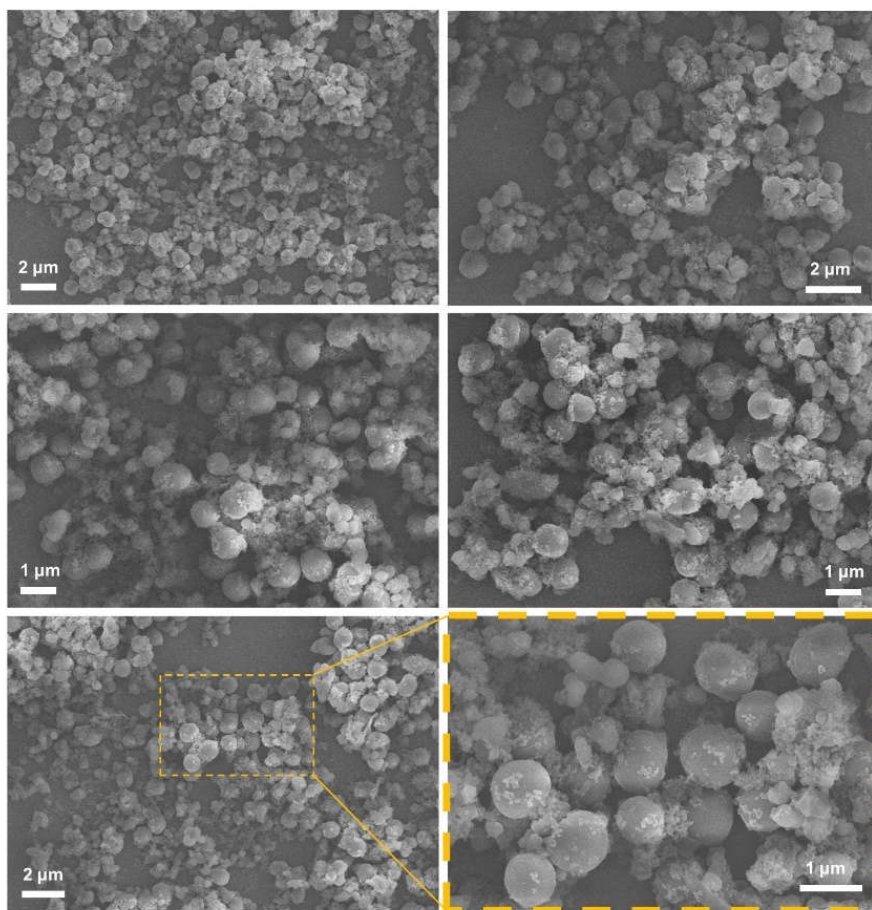

**Figure S20.** SEM images of “With thiophene”.

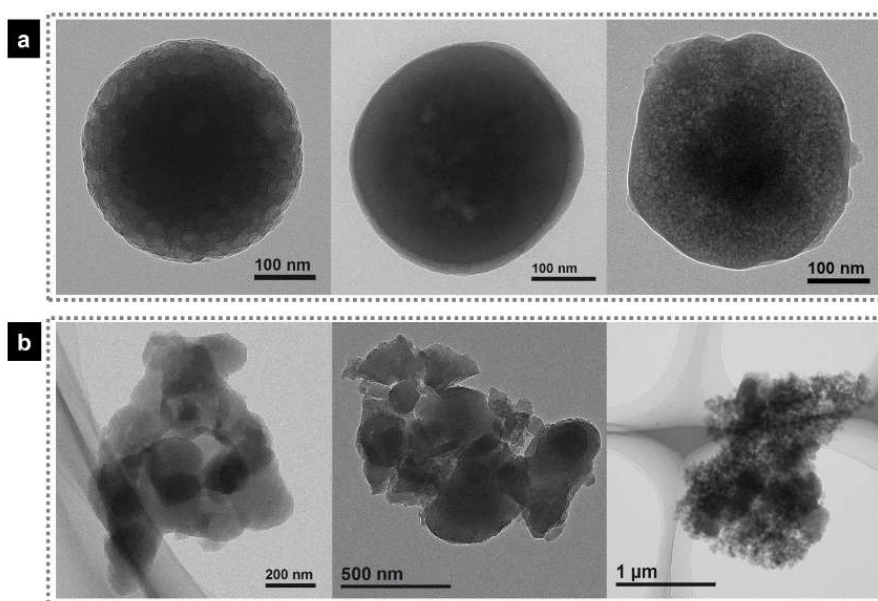

**Figure S21.** TEM comparison between “With thiophene” (a) and “Without thiophene” (b).

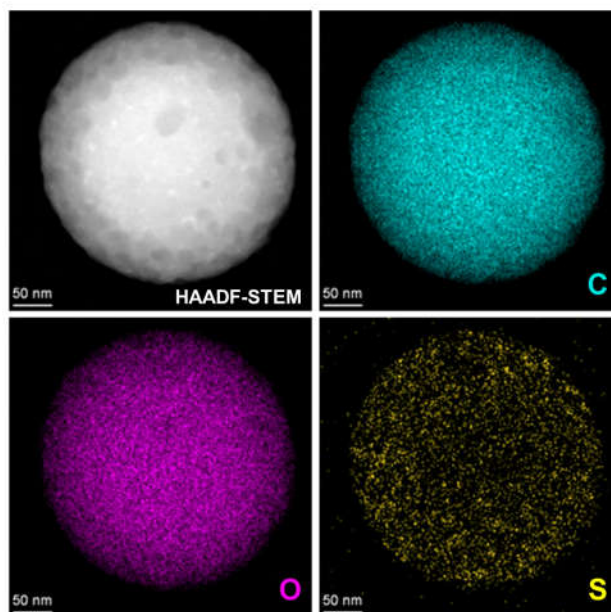

**Figure S22.** STEM images and EDS-elemental mapping of “With thiophene”.

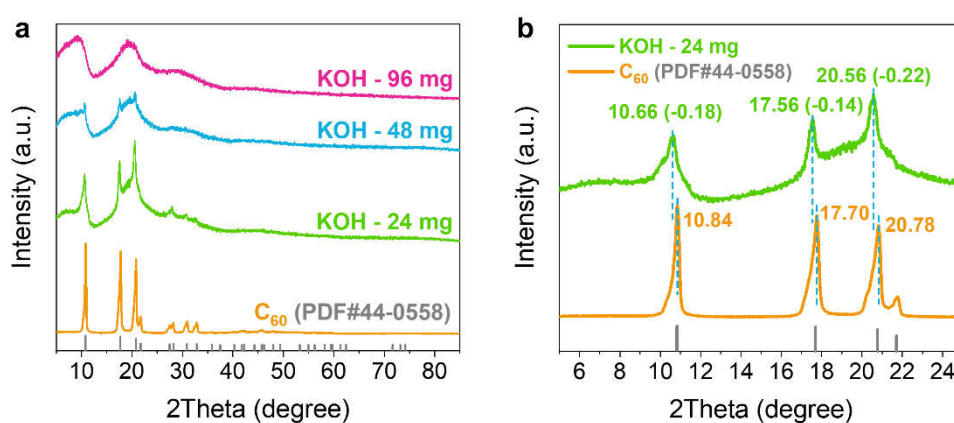

**Figure S23.** The impact of dosage of KOH on XRD patterns of “With thiophene” (a), the locally amplified XRD patterns of “With thiophene” (KOH-24 mg) and C<sub>60</sub>.

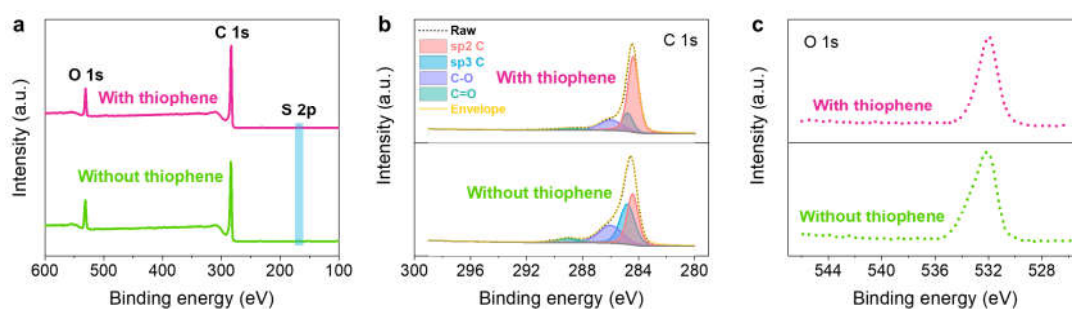

**Figure S24.** XPS comparison between “With thiophene” and “Without thiophene”:

survey spectra (a), detailed C 1s spectra (b) and O 1s spectra (c).

**Table S1.** The element atomic percentage of PCMNS, ACNA and C<sub>60</sub>.

(PCMNS: Polyhedral Carbon Micro-Nano-Shells; ACNA: Amorphous Carbon Nano-Aggregates)

| Sample          | Atomic percentage (%) |      |      |
|-----------------|-----------------------|------|------|
|                 | C                     | O    | S    |
| PCMNS           | 94.18                 | 5.50 | 0.32 |
| ACNA            | 95.23                 | 4.77 | 0.00 |
| C <sub>60</sub> | 97.05                 | 2.95 | 0.00 |

**Table S2.** V-t method summary of PCMNS and ACNA.

(PCMNS: Polyhedral Carbon Micro-Nano-Shells; ACNA: Amorphous Carbon Nano-Aggregates)

| V-t method summary                        |          |          |
|-------------------------------------------|----------|----------|
|                                           | PCMNS    | ACNA     |
| Slope                                     | 17.263   | 13.491   |
| Intercept                                 | 61.683   | 16.046   |
| Correlation coefficient                   | 0.999276 | 0.999386 |
| Micropore area (m <sup>2</sup> /g)        | 218.259  | 52.054   |
| Mesopore area (m <sup>2</sup> /g)         | 267.024  | 208.681  |
| Specific surface area (m <sup>2</sup> /g) | 485.283  | 260.735  |

**Table S3.** The selectivity comparison with the other typical carbon-based nanomaterials.

(PCMNS: Polyhedral Carbon Micro-Nano-Shells)

| Catalyst                  | Electrolyte                           | Selectivity (%) | Specific surface area (m <sup>2</sup> /g) | Reference                                                  |
|---------------------------|---------------------------------------|-----------------|-------------------------------------------|------------------------------------------------------------|
| Defect-rich porous carbon | 0.1 M Na <sub>2</sub> SO <sub>4</sub> | 85              | 2130                                      | <i>Angew. Chem. Int. Ed.</i> <b>2015</b> , 54, 1-6.        |
| Reduced graphene oxide    | 0.1 M KOH                             | ~100            | None                                      | <i>Nat. Catal.</i> <b>2018</b> , 1, 282-290.               |
| N-doped carbon nanohorn   | 0.1 M PBS                             | 90              | 271                                       | <i>Chem</i> <b>2018</b> , 4, 1–18.                         |
| Oxidized carbon nanotube  | 0.1 M PBS                             | ~88             | None                                      | <i>Nat. Catal.</i> <b>2018</b> , 1, 156–162.               |
| Mo1/O,S-doped graphene    | pH=8.7                                | 77              | None                                      | <i>Angew. Chem. Int. Ed.</i> <b>2020</b> , 59, 9171– 9176. |
| Co1/N-doped graphene      | 0.1 M PBS                             | ~70             | None                                      | <i>Nat. Mater.</i> <b>2020</b> , 19, 436-442.              |

|       |                                         |           |     |           |
|-------|-----------------------------------------|-----------|-----|-----------|
| PCMNS | 0.1 M<br>K <sub>2</sub> SO <sub>4</sub> | 86.7-93.3 | 485 | This work |
|-------|-----------------------------------------|-----------|-----|-----------|

**Table S4.** The reported yield rate of H<sub>2</sub>O<sub>2</sub>.

| Catalyst                                 | Electrolyte                           | Yield rate<br>(mmol/g/h) | Reference                                                |
|------------------------------------------|---------------------------------------|--------------------------|----------------------------------------------------------|
| Defect-rich porous carbon                | 0.1 M Na <sub>2</sub> SO <sub>4</sub> | 110                      | <i>Angew. Chem. Int. Ed.</i> <b>2015</b> , 54, 1-6.      |
| Pt <sub>1</sub> /S-doped carbon          | 0.1 M HClO <sub>4</sub>               | ~1950                    | <i>Nat. Commun.</i> <b>2016</b> , 7, 10922.              |
| NCMK3IL                                  | 0.1 M KOH                             | 562                      | <i>ACS Catal.</i> <b>2018</b> , 8, 2844-2856.            |
| F-mrGO                                   | 0.1 M KOH                             | 431                      | <i>Nat. Catal.</i> <b>2018</b> , 1, 282-290.             |
| Co-N-C                                   | 0.5 M H <sub>2</sub> SO <sub>4</sub>  | ~4330                    | <i>J. Am. Chem. Soc.</i> <b>2019</b> , 141, 12372-12381. |
| Pt <sub>1</sub> /hollow CuS <sub>x</sub> | 0.1 M HClO <sub>4</sub>               | 576                      | <i>Chem.</i> <b>2019</b> , 5, 2099-2110.                 |
| Co-POC-O                                 | 0.1 M KOH                             | 478                      | <i>Adv. Mater.</i> <b>2019</b> , 31, 1808173.            |
| oxo-G/NH <sub>3</sub> H <sub>2</sub> O   | 0.1 M KOH                             | 225                      | <i>ACS Catal.</i> <b>2019</b> , 9, 1283-1288.            |
| Co <sub>1</sub> /N-doped graphene        | 0.1 M KOH                             | 437                      | <i>Nat. Mater.</i> <b>2020</b> , 19, 436-442.            |
| Co-NC                                    | 0.1 M HClO <sub>4</sub>               | 275                      | <i>Chem.</i> <b>2020</b> , 6, 658.                       |
| O-CNTs                                   | 0.1 M KOH                             | -                        | <i>Nat. Catal.</i> <b>2018</b> , 1, 156-162.             |
| Fe-CNT                                   | 0.1 M PBS                             | -                        | <i>Nat. Commun.</i> <b>2019</b> , 10, 3997.              |
| PCMNS                                    | 0.1 M K <sub>2</sub> SO <sub>4</sub>  | 1103                     | This work                                                |

**Table S5** Element contents of “With thiophene” and “Without thiophene” from Element Analysis.

| Sample            | Percentage of weight (w.t.%) |       |      |      |       |
|-------------------|------------------------------|-------|------|------|-------|
|                   | C                            | O     | S    | H    | N     |
| With thiophene    | 79.94                        | 15.42 | 3.04 | 1.30 | ≤0.30 |
|                   | 79.62                        | 15.44 | 3.12 | 1.52 | ≤0.30 |
| Without thiophene | 90.27                        | 7.59  | 0.46 | 1.38 | ≤0.30 |
|                   | 90.05                        | 7.88  | 0.71 | 1.06 | ≤0.30 |
